# Supplementary material for: Transmission potential of mpox in mainland China, June-July 2023: estimating reproduction number during the initial phase of the epidemic
Source: PeerJ journal article supplement (doi:10.7717/peerj.16908), 2024-02-08

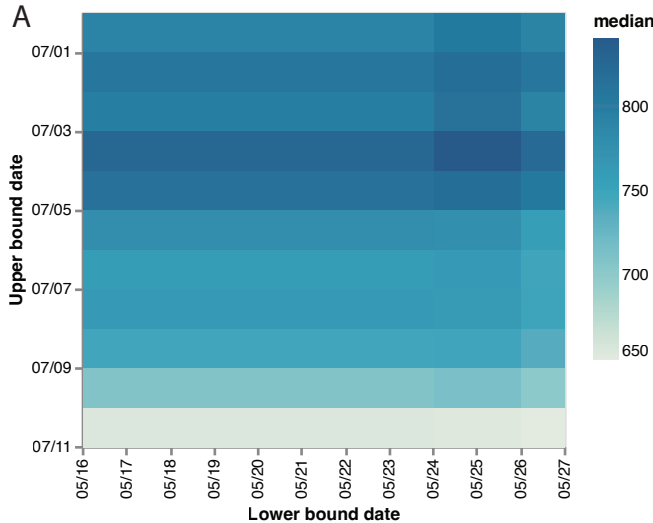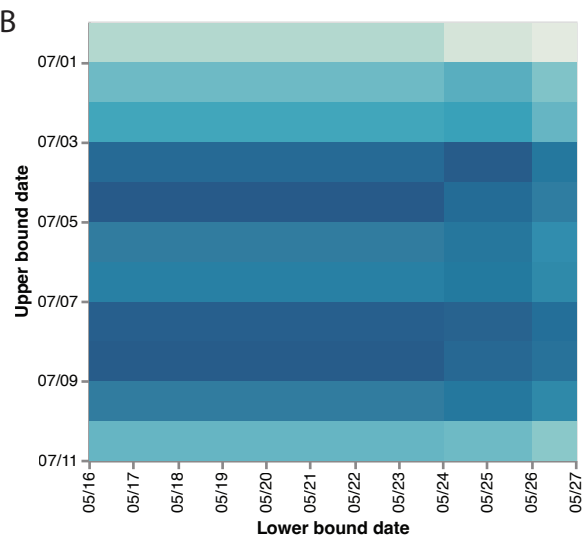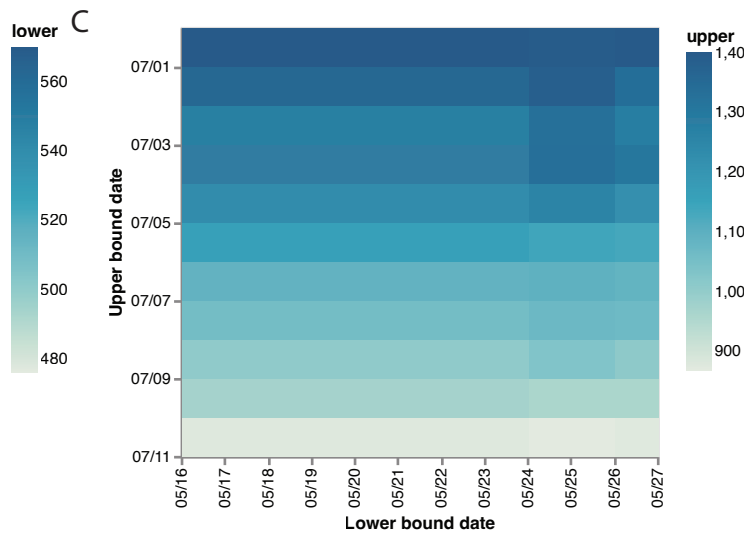

Supplement: FigureS4.pdf [file FigureS4.pdf]
