# Supplementary material for: Transmission potential of mpox in mainland China, June-July 2023: estimating reproduction number during the initial phase of the epidemic
Source: PeerJ journal article supplement (doi:10.7717/peerj.16908), 2024-02-08

# WHO China

as of 12 September 2023

## Date type

- Diagnosis
- Reported
- Onset

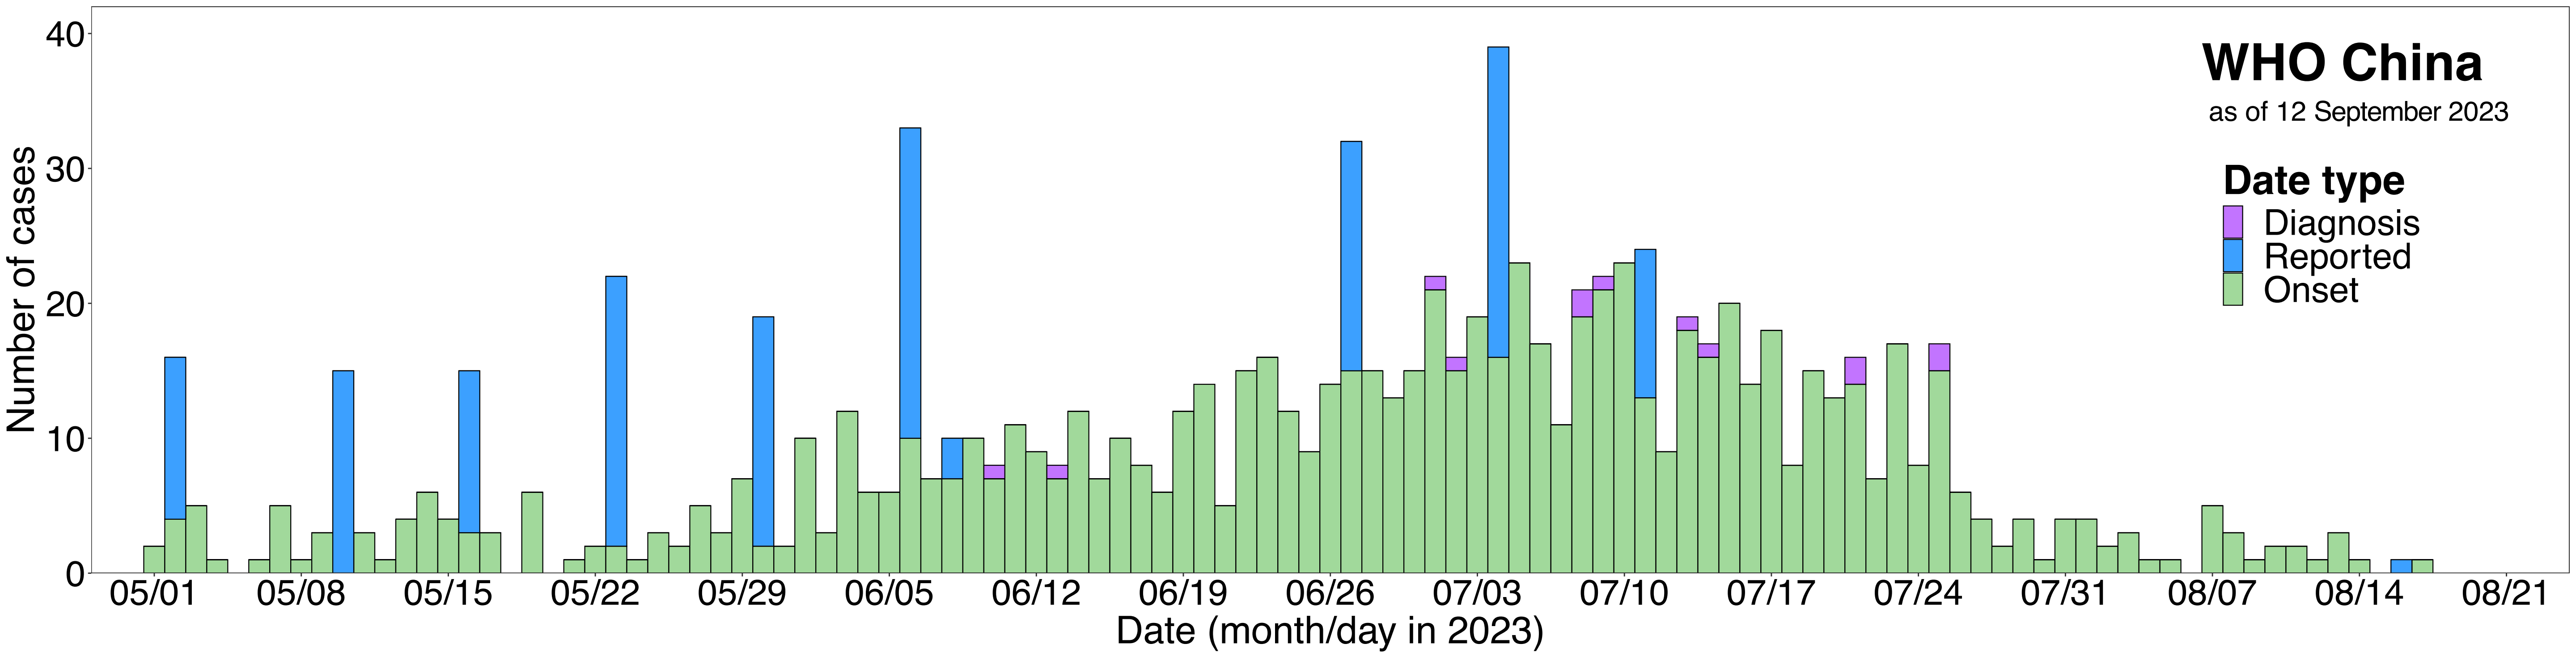

Supplement: FigureS7.pdf [file FigureS7.pdf]
